# Supplementary material for: FK506 biosynthesis is regulated by two positive regulatory elements in Streptomyces tsukubaensis
Source: PubMed Central journal article supplement (PMC3551636; doi:10.1186/1471-2180-12-238), 2012-10-19
Supplement: 1471-2180-12-238-S1.pdf [file 1471-2180-12-238-S1.pdf]

Additional file 1 Table of primers for PCR amplifications of the target putative regulatory genes

| #  | Primer name | Sequence                                          | Restr. Site |
|----|-------------|---------------------------------------------------|-------------|
| 1  | AsnC-F      | <u>GCATATGAAAGAAAAGTTGTCCTGGATT</u> CG            | NdeI        |
| 2  | AsnC-R      | GACCCCTGACTCCGGGCTAGTCTAG <u>A</u>                | XbaI        |
| 3  | fkbN-F1     | <u>CATATGGTTCCGGAAGT</u> GCGAGCAGCCCC             | NdeI        |
| 4  | fkbN-F      | <u>CATATGCGAGCAGCCCCTTATGAACTGAT</u> CGC          | NdeI        |
| 5  | fkbN-R      | GGGGCGACCGGTGCGGGTAGTCTAG <u>A</u>                | XbaI        |
| 6  | fkbR-F      | <u>GCATATGGAGTTACGCACCCTGGAGT</u> ACTTC           | NdeI        |
| 7  | fkbR-R      | CAACCCGCCCCACAGGACTGAGAATCTAGAG                   | XbaI        |
| 8  | AsnC-del-F1 | <u>GAATTCGGCGGCATCGGGTACACGCAC</u>                | EcoRI       |
| 9  | AsnC-del-R1 | GGCGTGGCACCCGTCACCTGTCTAG <u>A</u>                | XbaI        |
| 10 | AsnC-del-F2 | <u>TCTAGAGACCCACCTCGTATTCGGATCCT</u> GG           | XbaI        |
| 11 | AsnC-del-R2 | CCTGGACCGACTGCGCCCCAAGCTT <u>C</u>                | HindIII     |
| 12 | fkbR-del-F1 | <u>AAGCTTCGGGGTTACCAGGCGAT</u> GAC                | HindIII     |
| 13 | fkbR-del-R1 | GAGGGCGATGTCGGCGGTGCGATAT <u>GG</u>               | NdeI        |
| 14 | fkbR-del-F2 | <u>CATATGGCTGATCGCGGGCTGGACG</u>                  | NdeI        |
| 15 | fkbR-del-R2 | GGAGCTGTGGCTGCGGCAGTTCTAG <u>A</u>                | XbaI        |
| 16 | fkbN-del-F1 | <u>CAAGCTTCTACCTTCCGATCGCCCGCG</u>                | HindIII     |
| 17 | fkbN-del-R1 | ACGTGCACCATGCCGACGGCGCATAT <u>GT</u>              | NdeI        |
| 18 | fkbN-del-F2 | <u>CATATGCCCAAGCGGATCGACCTGCTC</u>                | NdeI        |
| 19 | fkbN-del-R2 | CCCGTTCGGCAGTTCGAGTGTCTAGAG                       | XbaI        |
| 20 | rppA-F      | <u>ATGGAGGCACATATGGCAGTTCTATGCACCCCT</u> GCG      | NdeI        |
| 21 | rppA-R      | AATCTAGAGTCGGTCATCGGTTGCCTCCC <u>GGGGCGGACGTG</u> | XbaI        |
| 22 | p_fkbR-F    | TTTTGAATTCTTCGACGTTTTTCTGCGGT <u>CACCC</u>        | EcoRI       |
| 23 | p_fkbR-R    | TTTTTTTTCATATGGGCCGGGAGGCTAGCA <u>ACC</u>         | NdeI        |
| 24 | p_fkbG-F    | TTTCGAATTCGCGTTCTCGTGCTGACCAAGGT <u>GTT</u>       | EcoRI       |
| 25 | p_fkbG-R    | TTTTTTTTCATATGGCCCAGGAATGCTAGGCG <u>GG</u>        | NdeI        |
| 26 | p_fkbN-F    | TTTTGAATTCCTGGACACGCCGATCACC <u>GTATGT</u>        | EcoRI       |
| 27 | p_fkbN-R    | CTTTTTTTCATATGGGAGCACACGGCG <u>CGA</u>            | NdeI        |
| 28 | p_fkbB-F    | AAAAAGGATCCCCGACACCGAACAGGTA <u>CTCGTC</u>        | BamHI       |
| 29 | p_fkbB-R    | CAAAAAACATATGGAAAACGCCTTCTCTCGGCTG <u>AC</u>      | NdeI        |
| 30 | p_allA-F    | TTTTTGAATTCGAGTCCGCGGCACGGG <u>CA</u>             | EcoRI       |
| 31 | p_allA-R    | CTTTTTTTCATATGGTCATCGTCCTTTCGTCG <u>GGA</u>       | NdeI        |
| 32 | p_allA-F    | TTTTTGAATTCGAGTCCGCGGCACGGG <u>CA</u>             | EcoRI       |
