# Supplementary material for: FK506 biosynthesis is regulated by two positive regulatory elements in Streptomyces tsukubaensis
Source: PubMed Central journal article supplement (PMC3551636; doi:10.1186/1471-2180-12-238), 2012-10-19
Supplement: 1471-2180-12-238-S2.pdf [file 1471-2180-12-238-S2.pdf]

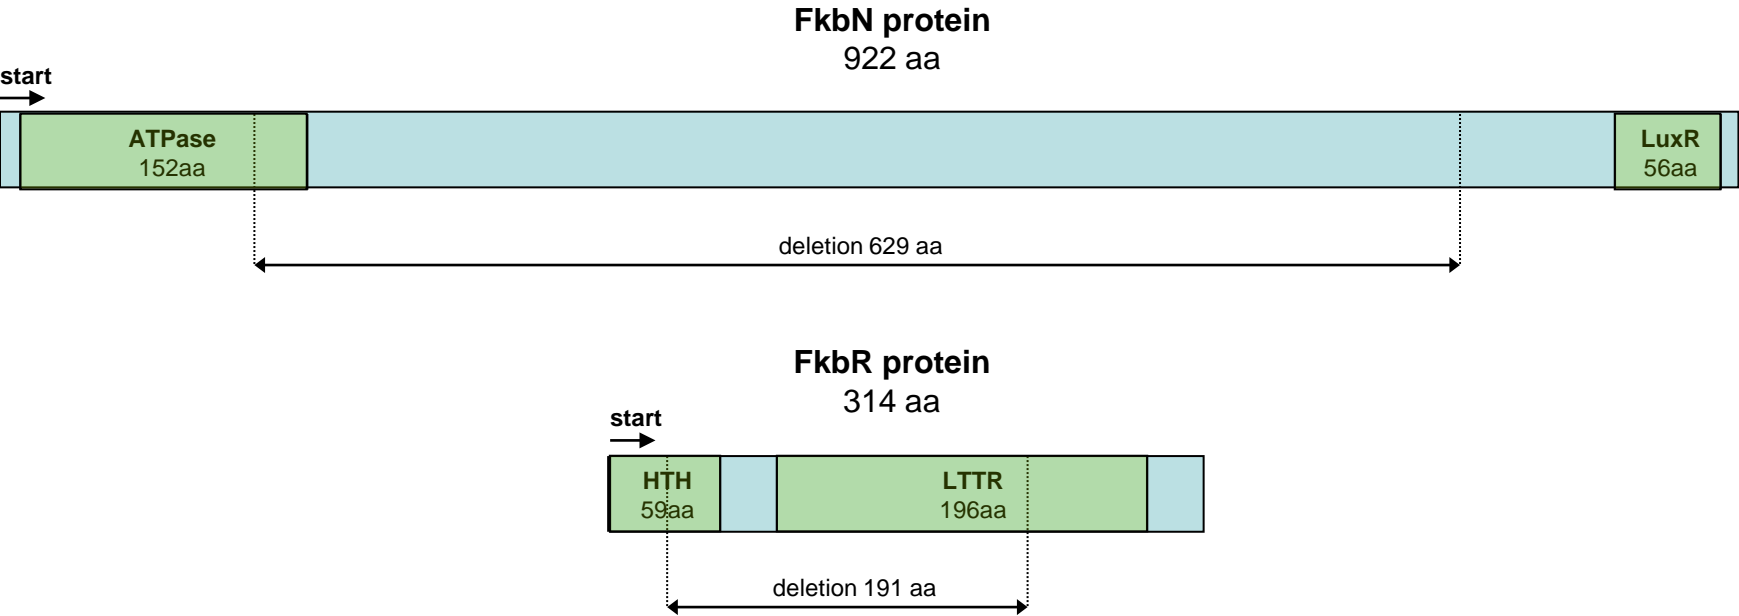

Additional file 3 Schematic representation of FkbR and FkbN protein domains and deleted regions
