# Supplementary material for: FK506 biosynthesis is regulated by two positive regulatory elements in Streptomyces tsukubaensis
Source: PubMed Central journal article supplement (PMC3551636; doi:10.1186/1471-2180-12-238), 2012-10-19
Supplement: 1471-2180-12-238-S3.pdf [file 1471-2180-12-238-S3.pdf]

Additional file 2 Table of primers used for RT-PCR analysis

| Primer name      | Sequence                   | Amplicon length |
|------------------|----------------------------|-----------------|
| <i>fkB-1</i> _5  | GCGGCGGCGTTGGCACCTCAT      | 280             |
| <i>fkB-1</i> _3  | ACCCGCGCCCCGTCTCCAAACTC    |                 |
| <i>fkBG</i> _5   | GTACGGATCGGCGACGCCCTGGAC   | 258             |
| <i>fkBG</i> _3   | GTCGCGCAGCCCCGCATTGAGTG    |                 |
| <i>fkBN</i> _5   | GGTGAACTCGGCCCGCAGC        | 339             |
| <i>fkBN</i> _3   | CGAGCAGCCCCTTATGAACTGATCGC |                 |
| <i>allA-1</i> _5 | GCCCTGGCGGAGCTTCTGGAGTCA   | 283             |
| <i>allA-1</i> _3 | TCACCGTCTGGCTGGGGGAGTTCA   |                 |
| <i>allA-2</i> _5 | GGCGGGATGCTGGCGGTGAAGG     | 365             |
| <i>allA-2</i> _3 | CGGGTCATGTCGTTCCACCATCAGG  |                 |
| <i>fkBR</i> _5   | GCCGACATCGCCCTCCAGGTG      | 257             |
| <i>fkBR</i> _3   | GGGTCCTGCGGGGCCTCTGC       |                 |
| <i>hrdB</i> _5   | GCCGCCGCGCCAAGAACC         | 419             |
| <i>hrdB</i> _3   | CCAGCGGCGTGTGCAGCGAGA      |                 |
